# Supplementary material
Source: publisher figshare collection journal article supplement (https://rs.figshare.com/ndownloader/files/18613688)
Supplement: Supplementary file 1 [file 18613688]

**Dogs perceive and spontaneously normalise formant-related speaker and vowel differences in human speech sounds**

**Authors:** Holly Root-Gutteridge, Victoria F. Ratcliffe, Anna T. Korzeniowska, David Reby

a)


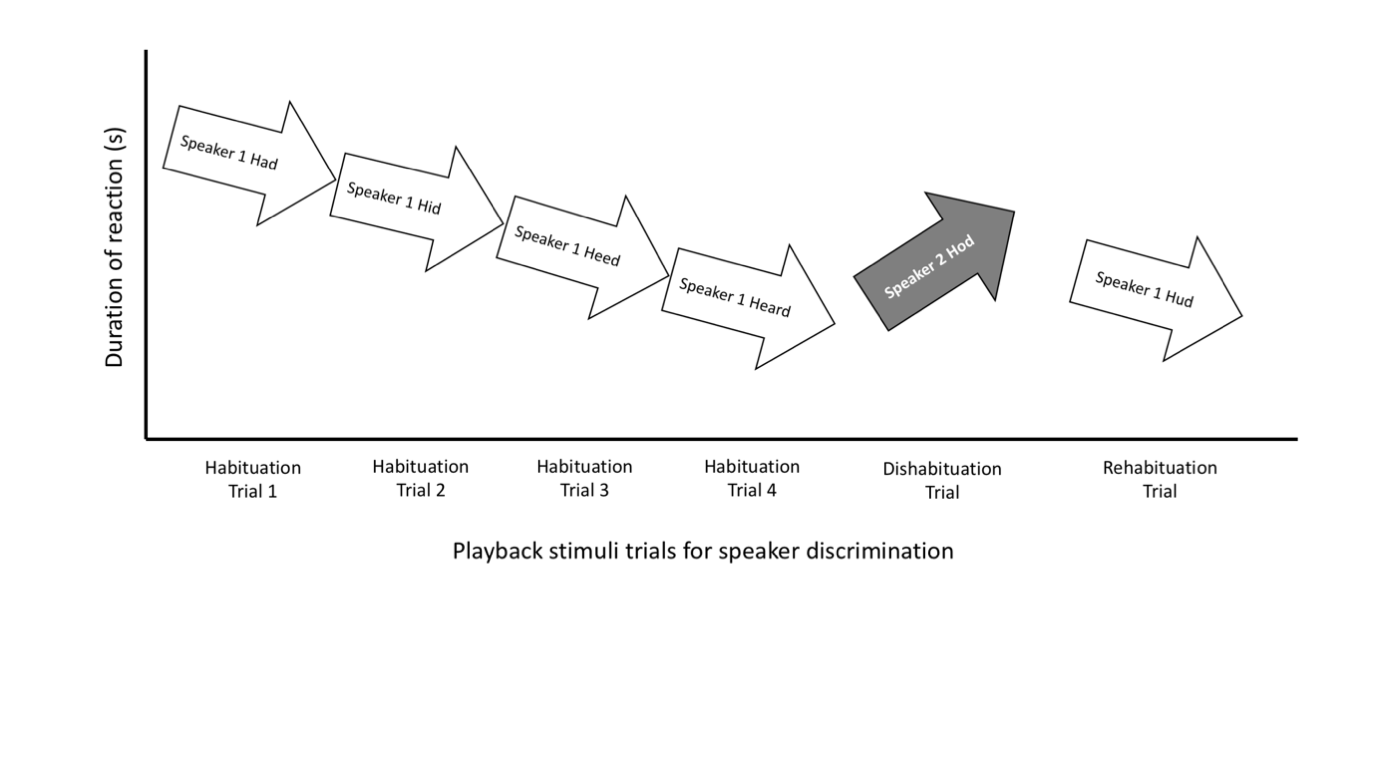


b)

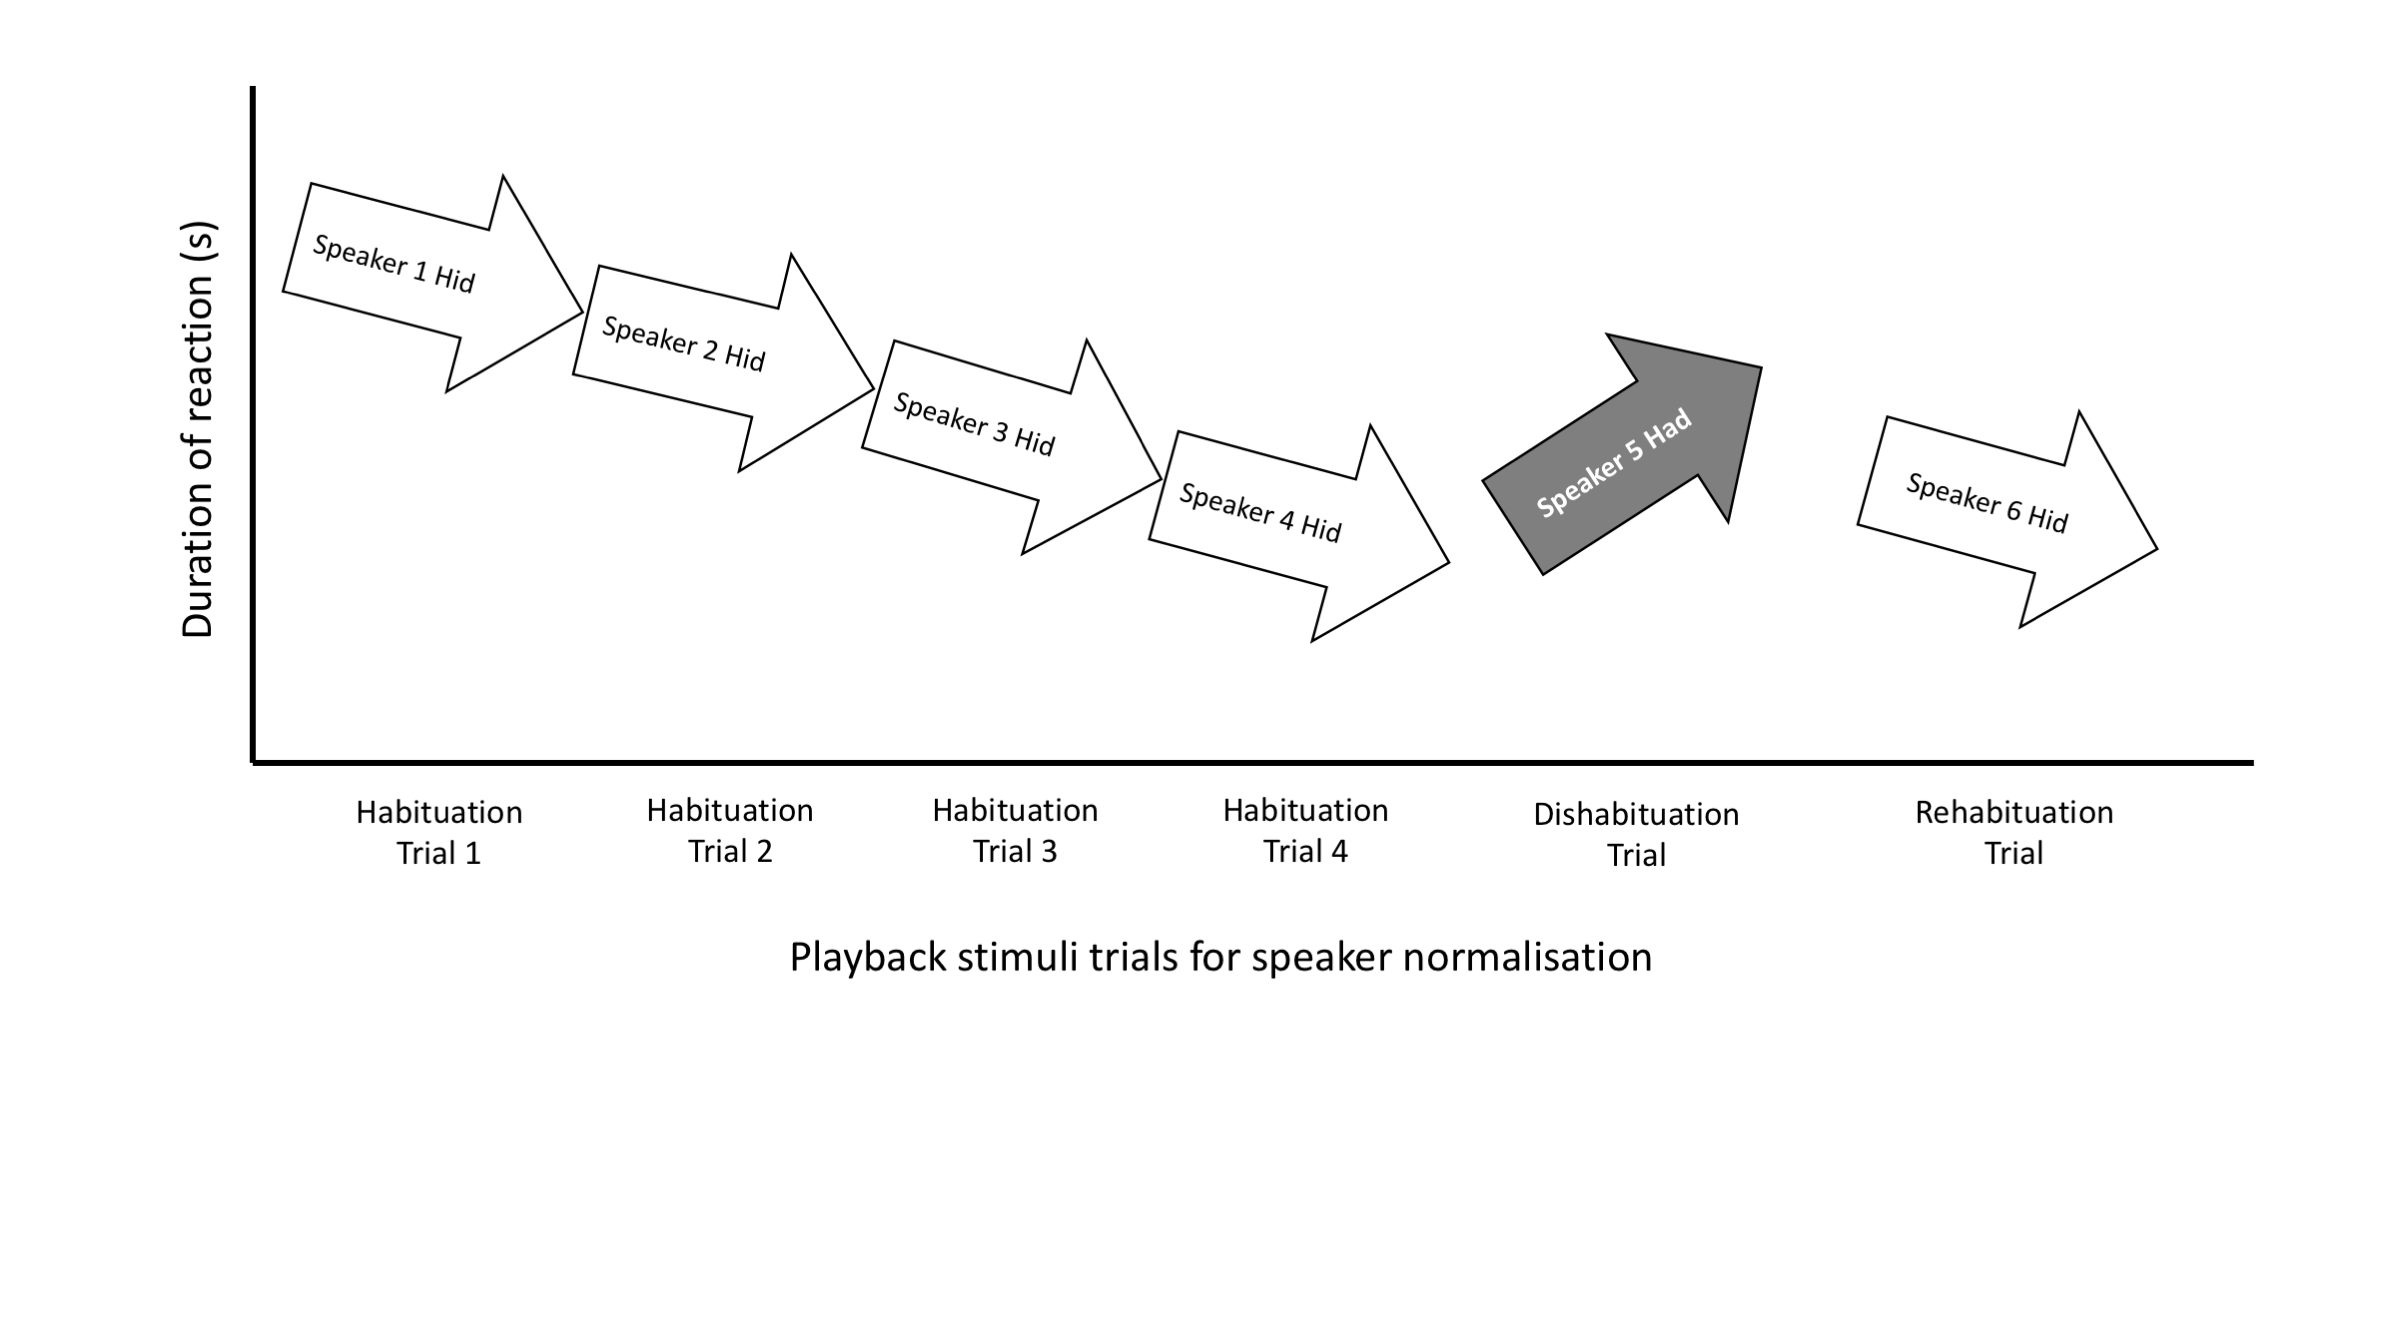


**ESM Figure 1:** Example of habituation-dishabituation response for a) speaker discrimination from four example words from speaker 1 before dishabituation to speaker 2 and re-habituation to a fifth word from speaker 1; and b) speaker normalisation of the word “hid” across four speakers before dishabituation to the word “had” from a fifth speaker, and re-habituation to “hid” from a sixth speaker.
